# Supplementary material for: Radiotherapy Scheme Effect on PD-L1 Expression for Locally Advanced Rectal Cancer
Source: MDPI journal article supplement (doi:10.3390/cells9092071), 2020-09-10
Supplement: s1 [file s1]

**Table S1. Tumor regression grade (TRG) according to PD-L1 expression**

**Tumor regression grade (TRG) according to median PD-L1+ cells rate on biopsy**

|            | PD-L1 $\leq$ 0.15 | PD-L1 $>$ 0.15 | p value |
|------------|-------------------|----------------|---------|
| <b>TRG</b> |                   |                | 0.58    |
| 1          | 2 (5.6%)          | 2 (5.4%)       |         |
| 2          | 9 (25.0%)         | 9 (24.3%)      |         |
| 3          | 9 (25.0%)         | 15 (40.5%)     |         |
| 4          | 13 (36.1%)        | 10 (27.0%)     |         |
| 5          | 3 (8.3%)          | 1 (2.7%)       |         |
| Missing    | 1                 | 0              |         |

**Tumor regression grade (TRG) according to median PD-L1+ cells rate on surgical specimen**

|            | PD-L1 $\leq$ 0.5 | PD-L1 $>$ 0.5 | p value |
|------------|------------------|---------------|---------|
| <b>TRG</b> |                  |               | 0.21    |
| 1          | 3 (8.1%)         | 1 (2.8%)      |         |
| 2          | 11 (29.7%)       | 7 (19.4%)     |         |
| 3          | 11 (29.7%)       | 13 (36.1%)    |         |
| 4          | 12 (32.4%)       | 11 (30.6%)    |         |
| 5          | 0 (0.0%)         | 4 (11.1%)     |         |
| Missing    | 0                | 1             |         |

**Tumor regression grade (TRG) according to deltaPD-L1+ cells rate**

|            | Delta $\leq$ 0.2 | Delta $>$ 0.2 | p value |
|------------|------------------|---------------|---------|
| <b>TRG</b> |                  |               | 0.38    |
| 1          | 2 (5.4%)         | 2 (5.6%)      |         |
| 2          | 10 (27.0%)       | 8 (22.2%)     |         |
| 3          | 13 (35.1%)       | 11 (30.6%)    |         |
| 4          | 12 (32.4%)       | 11 (30.6%)    |         |
| 5          | 0 (0.0%)         | 4 (11.1%)     |         |
| Missing    | 0                | 1             |         |

**Tumor regression grade (TRG) according to median PD-L1+ cells rate evolution profile**

|            | High-to-high | High-to-low | Low-to-high | Low-to-low | p value |
|------------|--------------|-------------|-------------|------------|---------|
| <b>TRG</b> |              |             |             |            | 0.51    |
| 1          | 1 (4.8%)     | 1 (6.3%)    | 0 (0.0%)    | 2 (9.5%)   |         |
| 2          | 5 (23.8%)    | 4 (25.0%)   | 2 (13.3%)   | 7 (33.3%)  |         |
| 3          | 8 (38.1%)    | 7 (43.8%)   | 5 (33.3%)   | 4 (19.0%)  |         |
| 4          | 6 (28.6%)    | 4 (25.0%)   | 5 (33.3%)   | 8 (38.1%)  |         |
| 5          | 1 (4.8%)     | 0 (0.0%)    | 3 (20.0%)   | 0 (0.0%)   |         |

|         |   |   |   |   |  |
|---------|---|---|---|---|--|
| Missing | 0 | 0 | 1 | 0 |  |
|---------|---|---|---|---|--|
